# Supplementary material for: Recycling of Egyptian Shammi Corn Stalks for Maintaining Sustainable Cement Industry: Scoring on Sustainable Development Goals
Source: MDPI journal article supplement (doi:10.3390/recycling9030034), 2024-04-26
Supplement: s1 [file s1]

Type of the Paper (Article)

# Supplementary file of the article titled “Recycling of Egyptian Shammi Corn Stalks for Maintaining Sustainable Cement Industry: Scoring on Sustainable Development Goals”

Fajr Qasem<sup>1</sup>, Mahmoud Sharaan<sup>1,2</sup>, Manabu Fujii<sup>3</sup>, Mahmoud Nasr<sup>1,4,\*</sup>

<sup>1</sup> Environmental Engineering Department, Egypt-Japan University of Science and Technology (E-JUST), Alexandria 21934, Egypt; fagr.kasim@ejust.edu.eg; mahmoud.sharaan@ejust.edu.eg

<sup>2</sup> Civil Engineering Department, Faculty of Engineering, Suez Canal University, Ismailia 41522, Egypt

<sup>3</sup> Civil and Environmental Engineering Department, Tokyo Institute of Technology, Meguro-Ku, Tokyo, 152-8552, Japan

<sup>4</sup> Sanitary Engineering Department, Faculty of Engineering, Alexandria University, Alexandria 21544, Egypt

\* Correspondence: mahmoud.nasr@ejust.edu.eg; Tel.: +201006390400

## Darkening of the mortar color

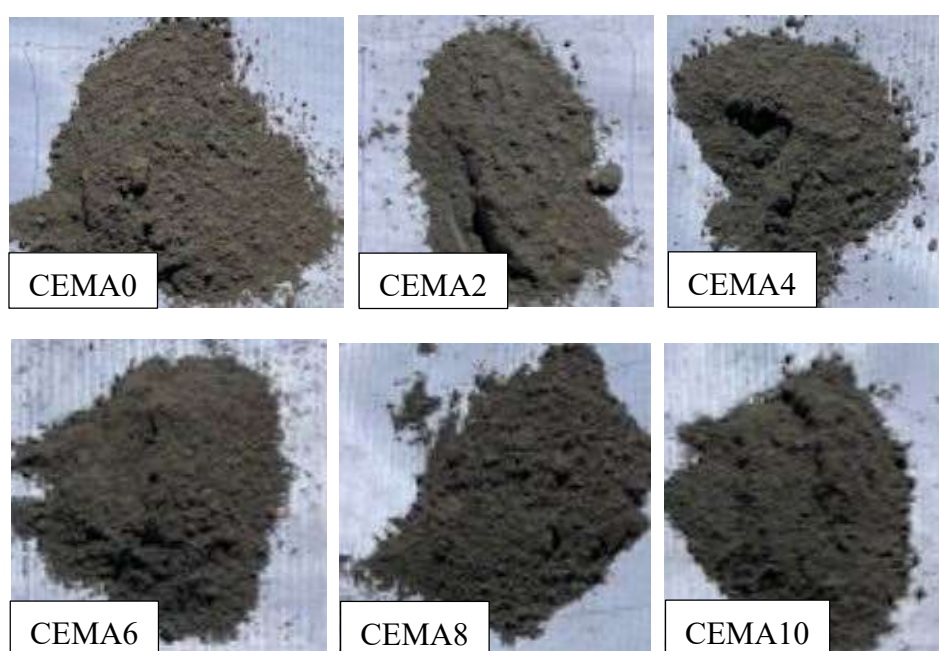

**Figure S1.** Color variations among the cement mixtures, used to estimate the darkness coefficient ( $\Delta E$ ) values.

## Egyptian Shammi corn

Maize (*Zea mays* L.), commonly known as corn, is an essential cereal crop in Egypt and its residual biomass can be involved in the manufacturing of several materials (e.g., oil, ethanol, glucose syrup, bioplastic, and composites). The conversion of this crop stalk into ashes, which are then used as a supplementary cementitious material (SCM) in cement has also been reported [1]; [2]. Shammi corn is one of these agronomic and food crops, containing higher silica levels in leaf blades, tassels, stems, leaf sheaths, and roots. Large quantities of the stalk parts of Shammi corn (e.g., stem, cob, leaf, husk; Supplementary Figure S2) are disposed of in landfills or incinerators, suggesting their potential recycling as a SCM in cement manufacturing. However, understanding the recyclability

performance of Shammi corn stalk ash (SCSA) should be evaluated, regarding material strength and durability and environmental implications, further opening new avenues for sustainable construction practices.

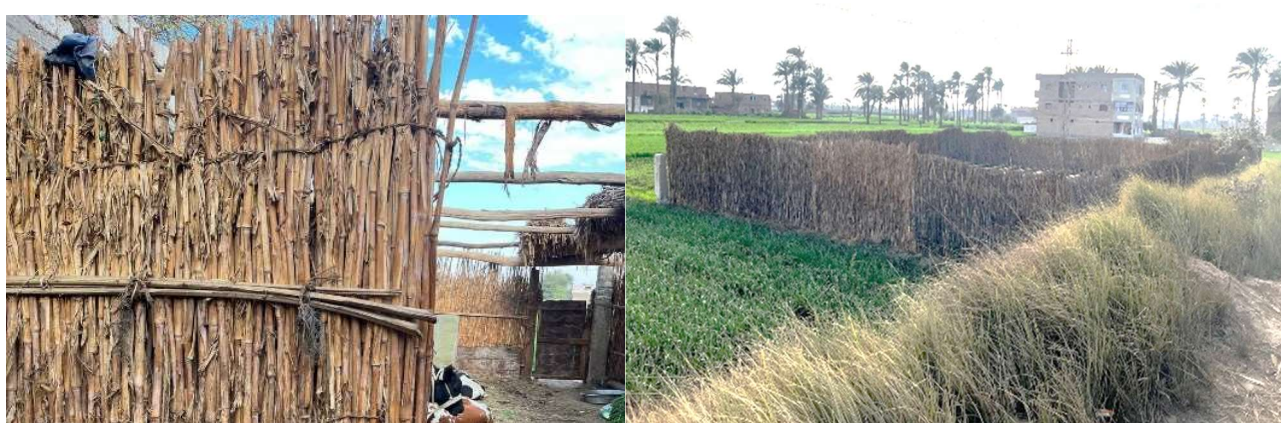

Figure S2. Egyptian Shammi corn residue.

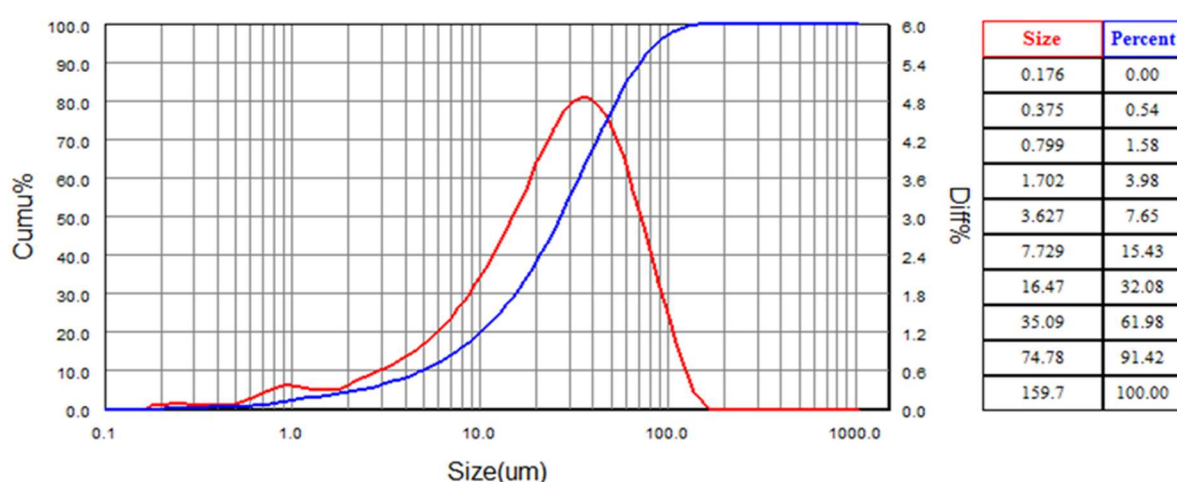

Figure S3. Estimation of Shammi corn stalk ash (SCSA) particle size.

### Primary selection of the optimum replacement ratio of Egyptian Shammi corn stalk ash (SCSA)

A preliminary test was conducted to determine cement mixture properties over a wide range of cement replacement ratios, observing a failure of cube cement specimens at a substitutional level of over 10% (Supplementary Figure S4). This step was conducted based on the results of previous studies [1]; [2]. Increasing the substitutional level of cement by over 10% caused considerable cracking to the sample and a reduction in the cement's compressive strengths.

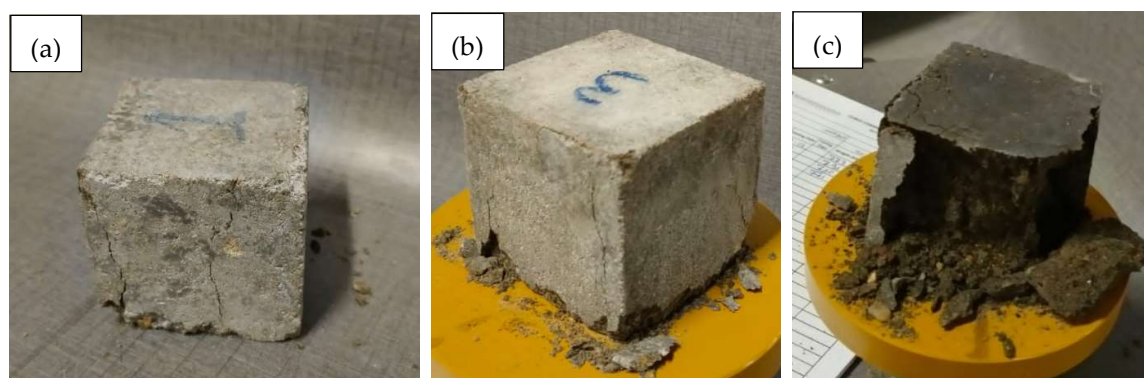

**Figure S4.** Failure of cement samples at substitution levels of (a) 5%, (b) 10%, and (c) 25%.

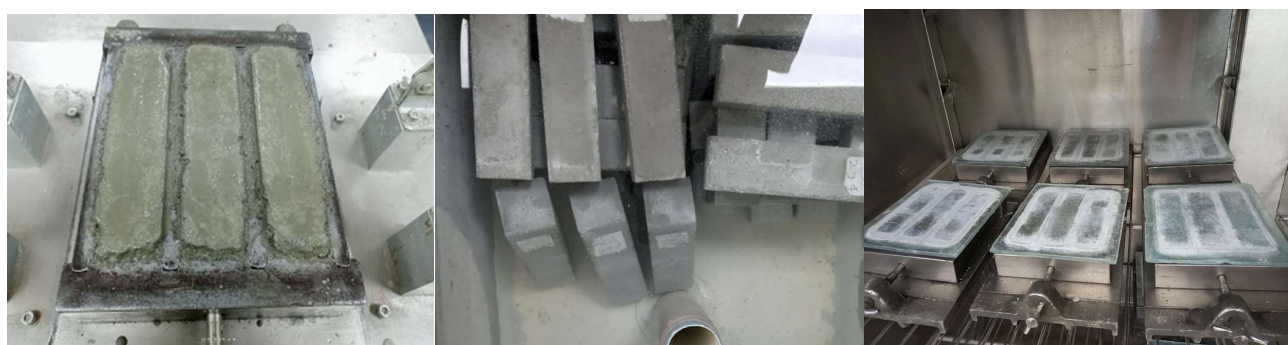

**Figure S5.** Cement moulds used for determining the strength criteria.

### Categories and Sub-categories for Decision of Alternatives Using AHP-TOPSIS

The normalized values were multiplied by (−1) if larger raw values reduce sustainability achievements [3].

**Table S1.** Normalized values of each indicator for the two alternatives.

| Indicator                          | CEMA0  | CEMA4  |
|------------------------------------|--------|--------|
| Strength (I1)                      | 0.668  | 0.744  |
| Setting time (I2)                  | −0.733 | −0.680 |
| Fineness (I3)                      | 0.636  | 0.772  |
| Workability (I4)                   | 0.750  | 0.661  |
| Initial cost (I5)                  | −0.832 | −0.555 |
| Maintenance cost (I6)              | −0.914 | −0.406 |
| Health and safety (I7)             | −0.832 | −0.555 |
| Employment opportunities (I8)      | 0.316  | 0.949  |
| CO <sub>2</sub> gas emissions (I9) | −0.721 | −0.693 |
| Energy consumption (I10)           | −0.721 | −0.693 |

**Table S2.** Mechanical strength for CEMA4 compared with other agricultural ashes used in cement preparation.

| Replacement material | Replacement ratio (w/w) | Compressive strength -28 days (N/mm <sup>2</sup> ) | Flexural strength -28 days (N/mm <sup>2</sup> ) | Ref. |
|----------------------|-------------------------|----------------------------------------------------|-------------------------------------------------|------|
| Corn cob ash         | 2.5%                    | 26.83                                              | 3.75                                            | [4]  |
| Sunflower stalk ash  | 2.5%                    | 26.72                                              | 2.67                                            | [4]  |
| Cornstalk ash        | 10%                     | 23                                                 | 5.6                                             | [1]  |
| Corn cob ash         | 10%                     | 34                                                 | 3.8*                                            | [5]  |

|              |     |      |     |            |
|--------------|-----|------|-----|------------|
| Fly ash      | 50% | 6.35 | 2.3 | [6]        |
| Corn cob ash | 50% | 7.55 | 2.2 | [6]        |
| SCSA         | 4%  | 60   | 8.2 | This study |

\* Split tensile strength

**Table S3.** Separation measures; Ideal separation (Si<sup>+</sup>). Negative-ideal separation (Si<sup>-</sup>).

| Indicator       | CEMA0  | CEMA4  |
|-----------------|--------|--------|
| Si <sup>+</sup> | 0.0796 | 0.0082 |
| Si <sup>-</sup> | 0.0106 | 0.0033 |

### Test procedures for estimating setting time (initial and final) of cement mixtures

This test method is used to determine the setting time of hydraulic cement by Vicat needle apparatus [7]; [8]. According to ASTM specification, the initial setting time shall not be less than 45 min but in the field, an initial setting of cement is preferred to be not less than 90 min.

**Table S4.** Procedures used to estimate setting time (initial and final) of cement mixtures.

| Step | Action                                                                                                                                                                                                                                                                                                                                   |
|------|------------------------------------------------------------------------------------------------------------------------------------------------------------------------------------------------------------------------------------------------------------------------------------------------------------------------------------------|
| 1    | Place the dry paddle and the dry bowl in the mixing position in the mixer. Place all the mixing water in the bowl                                                                                                                                                                                                                        |
| 2    | Add the cement to the water and allow 30 seconds for the absorption of the water. Start the mixer at low speed for 30 seconds. Stop for (15 seconds) and make sure no materials have collected on the sides of the bowl                                                                                                                  |
| 3    | Start mixing at medium speed for 1 min. Quickly, form the cement paste into the approximate shape of a ball with gloved hands. Putting hand at (15 cm) distance, throw the cement paste ball from hand to hand six times.                                                                                                                |
| 4    | Press the ball into the larger end of the conical ring to completely fill the ring with paste. Remove the excess at the larger end by a single movement of the palm of the hand. Place the ring on its larger end on the base of the plate of the Vicat apparatus.                                                                       |
| 5    | Slice off the excess paste at the smaller end at the top of the ring by a single sharp-ended trowel and smooth the top. (Take care not to compress the paste). Center the paste under the plunger end which shall be brought in contact with the surface of the paste, and tighten the set-screw.                                        |
| 6    | Set the movable indicator to the upper zero mark of the scale or take an initial reading, and release the rod immediately. This must not exceed 30 second after the completion of mixing. The paste shall be of normal consistency when the rod settles to a point 10±1 mm below the original surface in 30 second after being released. |
| 7    | Make trial paste with varying percentages of water until the normal. Consistency is obtained. Make each trial with fresh cement.                                                                                                                                                                                                         |

### Test procedures for estimating normal consistency of cement mixtures

The normal consistency of cement is the quantity of water that needs to be added to cement for the Vicat Apparatus plunger to penetrate the cement paste up to a depth of 33 – 35 mm from the top (or 5 – 7 mm from the bottom). The step-by-step procedure for carrying out a standard consistency test of cement using the Vicat Apparatus is as follows [7]; [9]:

**Table S5.** Procedures used to estimate normal consistency of cement mixtures.

| Step | Action                                                       |
|------|--------------------------------------------------------------|
| 1    | Take 400 grams of cement sample, and put it in a mixing tray |



|   |                                                                                                                                                                                                      |
|---|------------------------------------------------------------------------------------------------------------------------------------------------------------------------------------------------------|
| 2 | Start by assuming a consistency of 28%. So, add 28% of water (by the weight of cement) to the cement. That is, add 112 grams of water.                                                               |
| 3 | Mix the cement and water gently but thoroughly for 3 to 5 min to get a cement paste.                                                                                                                 |
| 4 | Place the mold on a non-porous glass plate. Use the cement paste to fill the mold. Use a trowel to trim off excess cement paste from the mold's surface, making the paste level with the mold's top. |
| 5 | Place the glass plate and Vicat mold under the moving rod of the Vicat apparatus. Lower the Vicat apparatus plunger gently until its tip just touches the surface of the cement paste.               |
| 6 | Quickly release the plunger, allowing it to penetrate the cement paste freely. Use the Vicat apparatus scale to record the plunger's depth of penetration                                            |

**Table S6.** Procedures of flow table test used to measure the workability of cement mortar.

| Step | Action                                                                                                                          |
|------|---------------------------------------------------------------------------------------------------------------------------------|
| 1    | The mixed mortar was placed on the flow table in truncated mould in two layers.                                                 |
| 2    | the flow table was mechanically raised by 10 mm and dropped at a rate of once per second for about 15 second.                   |
| 3    | flow diameter of the mortar flow was measured in orthogonal directions to determine the average flow value for each mortar mix. |

**Table S7.** Definitions of AHP-TOPSIS main categories and sub-categories used to assess the implementation of Shammi corn stalk ash (SCSA) in preparing cementitious mixtures.

| Main category       | Sub-category      | Definition                                                                                                                                                                                                                                                                                                                                                                                                                                                                                                                                                                                                            |
|---------------------|-------------------|-----------------------------------------------------------------------------------------------------------------------------------------------------------------------------------------------------------------------------------------------------------------------------------------------------------------------------------------------------------------------------------------------------------------------------------------------------------------------------------------------------------------------------------------------------------------------------------------------------------------------|
| Physical properties | Strength          | The compressive strength is defined as the maximum compressive load divided by the cross-sectional area of the sample.                                                                                                                                                                                                                                                                                                                                                                                                                                                                                                |
|                     | Setting time      | When the cement paste is set, it becomes a solid and no longer behaves as a liquid that can exert lateral hydrostatic pressure. Therefore, the first time corresponding to the total side pressure becoming null after the initial hydrostatic pressure is proposed as a definition of the setting time of cementitious materials.                                                                                                                                                                                                                                                                                    |
|                     | Fineness          | The fineness of the cement depends on the surface area that the cement particles occupy. The higher the surface area, the higher the fineness.                                                                                                                                                                                                                                                                                                                                                                                                                                                                        |
|                     | Workability       | Workability is an assembly of several properties, such as consistency, plasticity, and cohesion. Given that plasticity and cohesion are difficult to measure, consistency is frequently used as the measure of workability.                                                                                                                                                                                                                                                                                                                                                                                           |
| Cost                | Initial cost      | It includes costs of crusher, mill, kiln, and accessory equipment (e.g., dryer, grate cooler, conveyor, and cement silo). Additional infrastructure and equipment prices are used to estimate the cost of building an incinerator for ash production.                                                                                                                                                                                                                                                                                                                                                                 |
|                     | Maintenance cost  | It includes transportation of agricultural waste and raw material, energy consumption, chemical utilization, and salary.                                                                                                                                                                                                                                                                                                                                                                                                                                                                                              |
| Social impact       | Health and Safety | In the cement-manufacturing industries, quarrying causes dust emissions and noise. Dust is also released by raw material preparation, clinker burning, and packaging. The raw material collection and transportation procedures are accompanied by releasing various toxic gas emissions, such as CO, CO <sub>2</sub> , NO <sub>x</sub> , and SO <sub>2</sub> . The clinker burning/cooling and cement milling have the potential to cause cancer and lung diseases (e.g., lung function impairment). Because of these adverse impacts, ensuring healthy and safe working conditions for employees is one of the most |

|                      |                           |                                                                                                                                                                                                                                                                                                                                                                                                                                                                                                                                                                                                 |
|----------------------|---------------------------|-------------------------------------------------------------------------------------------------------------------------------------------------------------------------------------------------------------------------------------------------------------------------------------------------------------------------------------------------------------------------------------------------------------------------------------------------------------------------------------------------------------------------------------------------------------------------------------------------|
| Environmental impact |                           | significant issues for the cement industry. SCSA preparation is a promising strategy to reduce emissions of smoke, particulates, breakdown products, dioxins, and associated odour accompanied by crop residue burning.                                                                                                                                                                                                                                                                                                                                                                         |
|                      | Employment Opportunities  | The cement industry plays a major role in improving the living standard by creating a lot of employment, and job vacancies. Using agricultural residues to partially replace cement creates job opportunities due to cement capacity expansion, further enhancing the welfare level. Increasing the number and rate of employed labor in the cement industry has a direct correlation with manufacturer profit and investment.                                                                                                                                                                  |
|                      | CO <sub>2</sub> emissions | Cement production is one of the principal anthropogenic sources of CO <sub>2</sub> emissions. The three stages responsible for this air pollution source are raw material quarrying and preparation, clinker calcination, and cement grinding, as previously reported. CO <sub>2</sub> can be released from the decarbonation of CaCO <sub>3</sub> and MgCO <sub>3</sub> to give CaO and MgO, respectively. SCSA utilization is beneficial to reduce the generation of climate-relevant emissions, mainly emissions of CO <sub>2</sub> , accompanied by the incineration of agricultural waste. |
|                      | Energy Consumption        | Clinker substitution, alternative fuel use, and waste heat recovery are responsible for consuming large amounts of energy in the cement-producing industries. For instance, about 100 kWh of electrical energy is consumed for each ton of cement production. Most of this amount is utilized for the grinding of coal, raw materials, and clinker.                                                                                                                                                                                                                                             |

**Table S8.** A questionnaire sheet used in the multi-criteria decision making (MCDM) model for Shammi corn stalk ash (SCSA) utilization in cement production.

|                           | CEMA0                | 9 | 7 | 5 | 3 | 1 | 3 | 5 | 7 | 9 | CEMA4 |
|---------------------------|----------------------|---|---|---|---|---|---|---|---|---|-------|
|                           | Economic category    |   |   |   |   |   |   |   |   |   |       |
| Initial cost              |                      |   |   |   |   |   |   |   |   |   |       |
| Maintenance cost          |                      |   |   |   |   |   |   |   |   |   |       |
|                           | Social impact        |   |   |   |   |   |   |   |   |   |       |
| Health and Safety         |                      |   |   |   |   |   |   |   |   |   |       |
| Employment opportunities  |                      |   |   |   |   |   |   |   |   |   |       |
|                           | Environmental impact |   |   |   |   |   |   |   |   |   |       |
| CO <sub>2</sub> emissions |                      |   |   |   |   |   |   |   |   |   |       |
| Energy consumption        |                      |   |   |   |   |   |   |   |   |   |       |

**Table S9.** Saaty's Fundamental Scale used in the multi-criteria decision making (MCDM) model for Shammi corn stalk ash (SCSA) utilization in cement production. The scores were assigned using interconnected decision elements from experimental work, a comprehensive review of previous studies, and comments from experts, professionals, and practitioners.

| Score | Definition                          | Explanation                                                      |
|-------|-------------------------------------|------------------------------------------------------------------|
| 1     | Equal importance                    | Two activities contribute equally to the objective               |
| 3     | Weak importance of one over another | Experience and judgment slightly favor one activity over another |

|         |                                                    |                                                                                                 |
|---------|----------------------------------------------------|-------------------------------------------------------------------------------------------------|
| 5       | Essential or strong importance                     | Experience and judgment strongly favor one activity over another                                |
| 7       | Demonstrated importance                            | An activity is strongly favored and its dominance demonstrated in practice                      |
| 9       | Absolute importance                                | The evidence favoring one activity over another is of the highest possible order of affirmation |
| 2,4,6,8 | Intermediate values between two adjacent judgments | When compromise is needed                                                                       |

**Table S10.** Random consistency index (RI).

| Order of matrix (n) | 1    | 2    | 3    | 4    | 5    | 6    | 7    | 8    | 9    | 10   |
|---------------------|------|------|------|------|------|------|------|------|------|------|
| Random index (RI)   | 0.00 | 0.00 | 0.58 | 0.89 | 1.12 | 1.24 | 1.33 | 1.40 | 1.45 | 1.49 |

In this matrix (Table S11), the number of targets achieved per goal was identified and then divided by the total number of targets for the same goal [10].

**Table S11.** Scoring on the fulfilment of each goal by its associated indicators (Matrix<sub>(8×10)</sub>). Correlation between 10 criteria (I1–I10) with 8 SDGs. The indicators are Strength (I1); Setting time (I2); Finess (I3); Workability (I4); Initial cost (I5); Maintenance cost (I6); Health and safety (I7); Employment opportunities (I8); CO<sub>2</sub> gas emissions (I9); Energy consumption (I10). The goals are Goal 1: No poverty; Goal 2: zero hunger; Goal 3: Good health and well-being; Goal 8: Decent work and economic growth; Goal 9: Industry innovation and infrastructure; Goal 11: Sustainable cities and communities; Goal12: Responsible consumption and production; Goal 13: Climate action.

|         | I1    | I2    | I3    | I4    | I5    | I6    | I7    | I8    | I9    | I10   |
|---------|-------|-------|-------|-------|-------|-------|-------|-------|-------|-------|
| Goal 1  | 0.000 | 0.000 | 0.000 | 0.000 | 0.000 | 0.000 | 0.000 | 0.143 | 0.000 | 0.000 |
| Goal 2  | 0.000 | 0.000 | 0.000 | 0.000 | 0.000 | 0.000 | 0.000 | 0.250 | 0.000 | 0.000 |
| Goal 3  | 0.000 | 0.000 | 0.000 | 0.000 | 0.000 | 0.000 | 0.231 | 0.000 | 0.231 | 0.077 |
| Goal 8  | 0.000 | 0.000 | 0.000 | 0.000 | 0.167 | 0.167 | 0.083 | 0.167 | 0.000 | 0.000 |
| Goal 9  | 0.375 | 0.375 | 0.375 | 0.375 | 0.000 | 0.000 | 0.000 | 0.000 | 0.000 | 0.000 |
| Goal 11 | 0.300 | 0.300 | 0.300 | 0.300 | 0.000 | 0.000 | 0.000 | 0.000 | 0.000 | 0.000 |
| Goa12   | 0.091 | 0.091 | 0.091 | 0.091 | 0.273 | 0.273 | 0.091 | 0.273 | 0.000 | 0.000 |
| Goal 13 | 0.000 | 0.000 | 0.000 | 0.000 | 0.000 | 0.000 | 0.000 | 0.000 | 0.600 | 0.000 |

## References

- [1] Salem, S.; Hamdy, Y.; Abdelraouf, E.-S.; Shazly, M. Towards sustainable concrete: Cement replacement using Egyptian cornstalk ash. *Case Stud. Constr. Mater.* **2022**, *17*, e01193. <https://doi.org/10.1016/j.cscm.2022.e01193>
- [2] Maglad, A. M.; Amin, M.; Zeyad, A. M.; Tayeh, B. A.; Agwa, I. S. Engineering properties of ultra-high strength concrete containing sugarcane bagasse and corn stalk ashes. *J. Mater. Res. Technol.* **2023**, *23*, 3196–3218. <https://doi.org/10.1016/j.jmrt.2023.01.197>
- [3] Heiba, Y.; Ibrahim, M.; Mohamed, A.; Fujii, M.; Nasr, M. Developing smart sustainable irrigation matrix (SIM)-based model for selection of best irrigation techniques: A framework to achieve SDGs. *Journal of Cleaner Production*, **2023**, *420*, 138404. <https://doi.org/10.1016/j.jclepro.2023.138404>
- [4] Șerbănoiu, A.A.; Grădinaru, C.M.; Muntean, R.; Cimpoeșu, N.; Șerbănoiu, B.V. Corn Cob Ash versus Sunflower Stalk Ash, Two Sustainable Raw Materials in an Analysis of Their Effects on the Concrete Properties. *Materials* **2022**, *15*, 868. <https://doi.org/10.3390/ma15030868>

- 
- [5] Sharma, N.; Sharma, P.; Parashar, A. Incorporation of Silica Fume and Waste Corn Cob Ash in Cement and Concrete for Sustainable Environment,” *Materials Today: Proceedings*, **2022**, 62, Part 6, 4151-4155. <https://doi.org/10.1016/j.matpr.2022.04.677>
- [6] Šupić, S.; Malešev, M.; Pantić, V.; Lukić, I.; Radonjanin, V.; Ognjanović, M.; Broćeta, G. Environmentally Friendly Masonry Mortar Blended with Fly Ash, Corn Cob Ash or Ceramic Waste Powder. *Materials* **2023**, 16, 6725. <https://doi.org/10.3390/ma16206725>
- [7] 5513, I. Vicat apparatus—specification. *Bureau of Indian Standards*, **1996**
- [8] C191-21, Standard Test Methods for Time of Setting of Hydraulic Cement by Vicat Needle. **2021**. <https://www.astm.org/c0191-21.html>
- [9] C187-16, Standard Test Method for Amount of Water Required for Normal Consistency of Hydraulic Cement Paste. **2023**. <https://www.astm.org/c0187-16.html>
- [10] Saqr, A.; Nasr, M.; Fujii, M.; Yoshimura, C.; Ibrahim, M. Delineating suitable zones for solar-based groundwater exploitation using multi-criteria analysis: A techno-economic assessment for meeting sustainable development goals (SDGs). *Groundw. Sustain. Dev.* **2024**, 25, 101087. <https://doi.org/10.1016/j.gsd.2024.101087>

**Disclaimer/Publisher’s Note:** The statements, opinions and data contained in all publications are solely those of the individual author(s) and contributor(s) and not of MDPI and/or the editor(s). MDPI and/or the editor(s) disclaim responsibility for any injury to people or property resulting from any ideas, methods, instructions or products referred to in the content.
